# Supplementary material for: Structural, Mechanistic, and Functional Insights into an Arthrobacter nicotinovorans Molybdenum Hydroxylase Involved in Nicotine Degradation
Source: Molecules. 2021 Jul 20;26(14):4387. doi: 10.3390/molecules26144387 (PMC8305194; doi:10.3390/molecules26144387)
Supplement: Supplementary file 1 [file molecules-26-04387-s001.zip › molecules-1282361 -si/molecules-1282361 -si.pdf]

### Supplementary Figures:

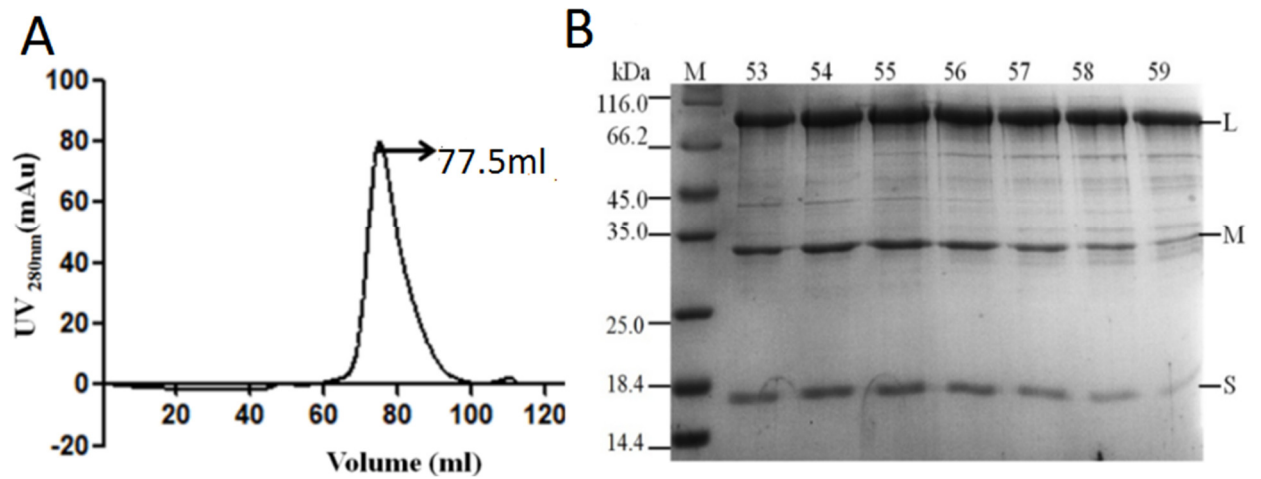

Supplementary Figure 1. Purification of the Kdh holoenzyme. (A) Kdh is monomeric in solution, with a molecular mass of about 140 kDa. Elution volume of Kdh is 77.5 mL through size-exclusion chromatography on superdex 200 HiLoad 16/60. (B) SDS-PAGE analysis of the fractions from size-exclusion chromatography. Fractions 53-59 are the elution tubes corresponding to the peak. L, M, and S are the large, middle and small subunits of Kdh, respectively.

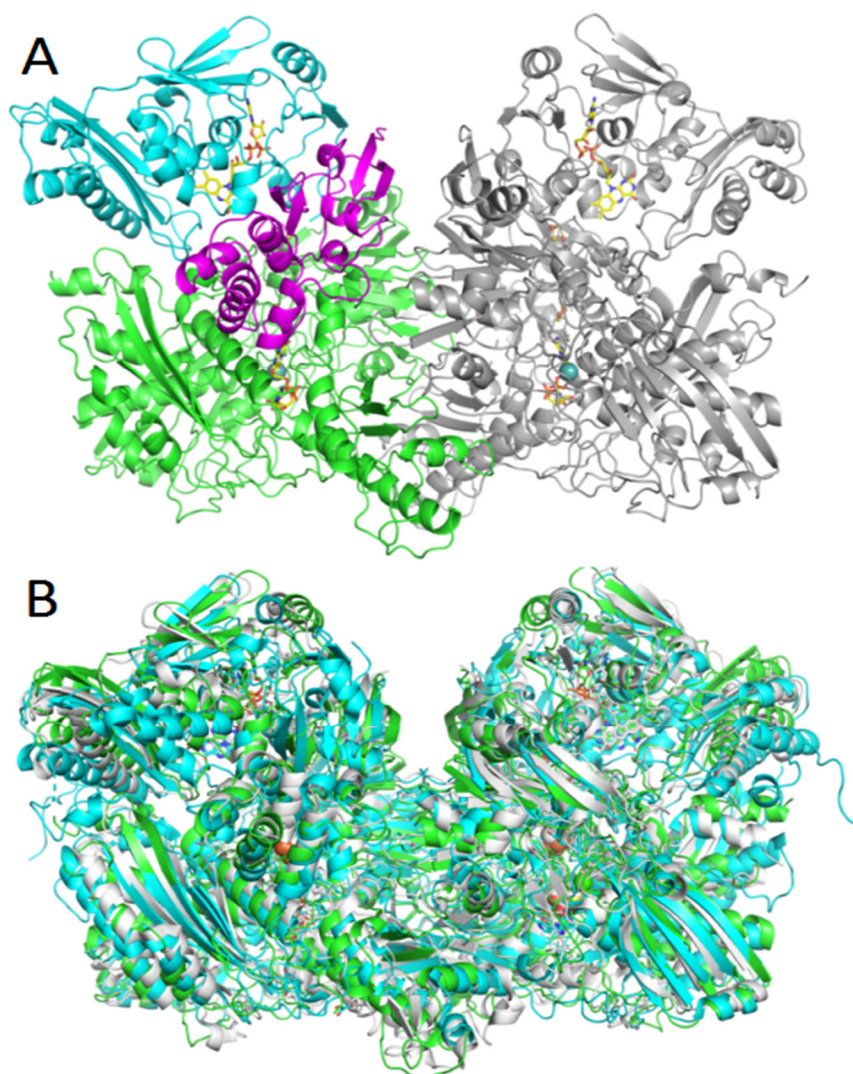

Supplementary Figure 2. (A) Overall structure of the Kdh holoenzyme (PDB code: 7DQX). (B) Compare the structures of Kdh, XDH and Qor. A stereoview of Kdh (green), Bovine XDH (PDB code: 1V97; cyan ) and Qor (PDB code: 1T3Q; white), the superimposition was done on the whole molecule.

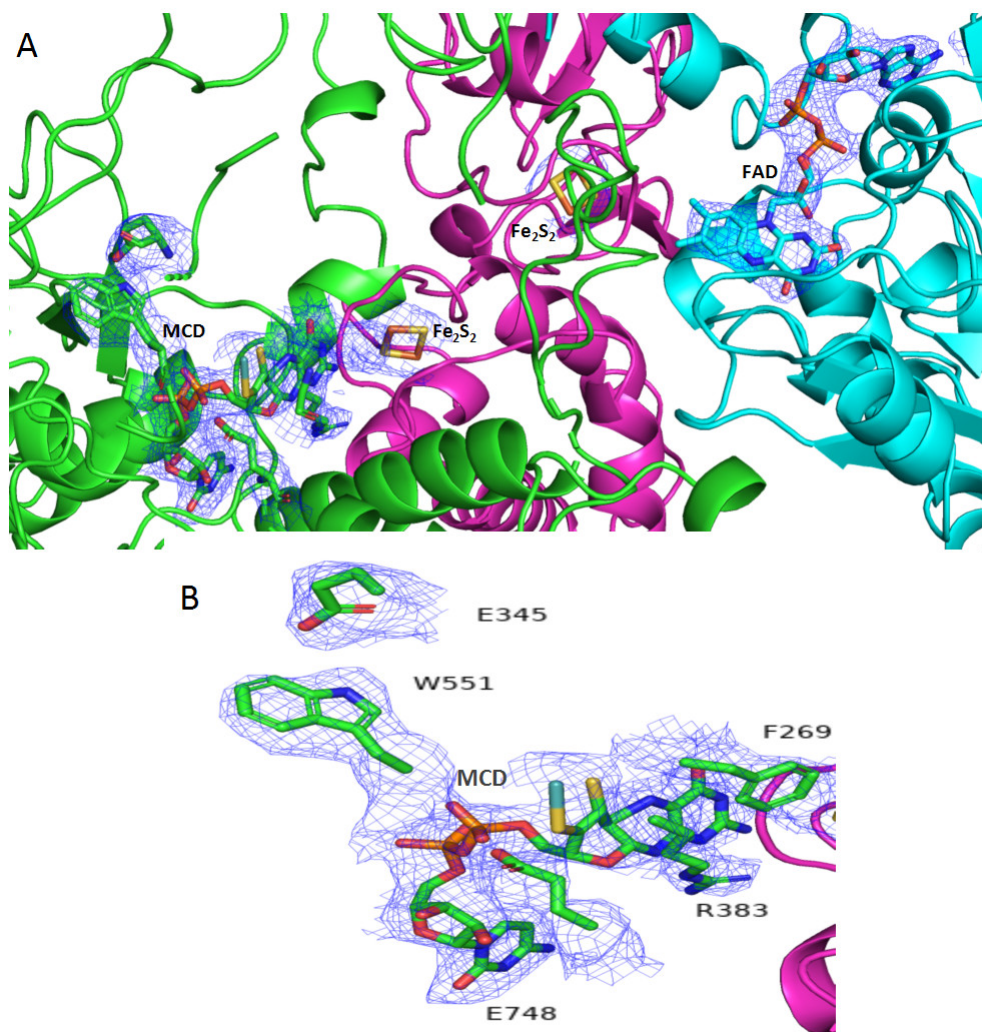

Supplementary Figure 3. Electron density around the Kdh cofactors. (A) Local electron density map of three subunits of cofactors MCD,  $\text{Fe}_2\text{S}_2$ , FAD. (B) Electron density of important amino acids near MCD of the large subunit.

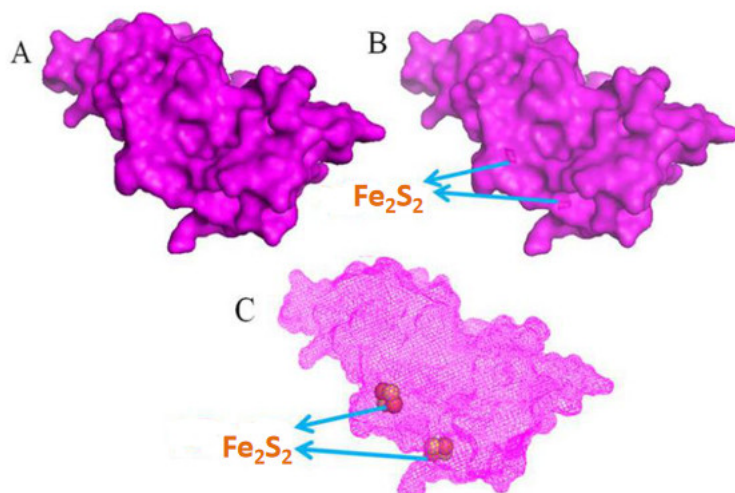

Supplementary Figure 4. The two  $\text{Fe}_2\text{S}_2$  clusters are completely wrapped inside KdhS (A and B). The  $\text{Fe}_2\text{S}_2$  clusters cannot be seen when watched from outside the surface of KdhS. KdhS is shown as surface representation while the two  $\text{Fe}_2\text{S}_2$  clusters are shown as sticks. The  $\text{Fe}_2\text{S}_2$  clusters cannot be seen if the surface of KdhS is set opaque (A), and can be seen existing inside KdhS if the surface of KdhS is set transparent (B). The  $\text{Fe}_2\text{S}_2$  clusters are buried inside KdhS (C). KdhS is shown as a mesh presentation, with the  $\text{Fe}_2\text{S}_2$  clusters inside it.

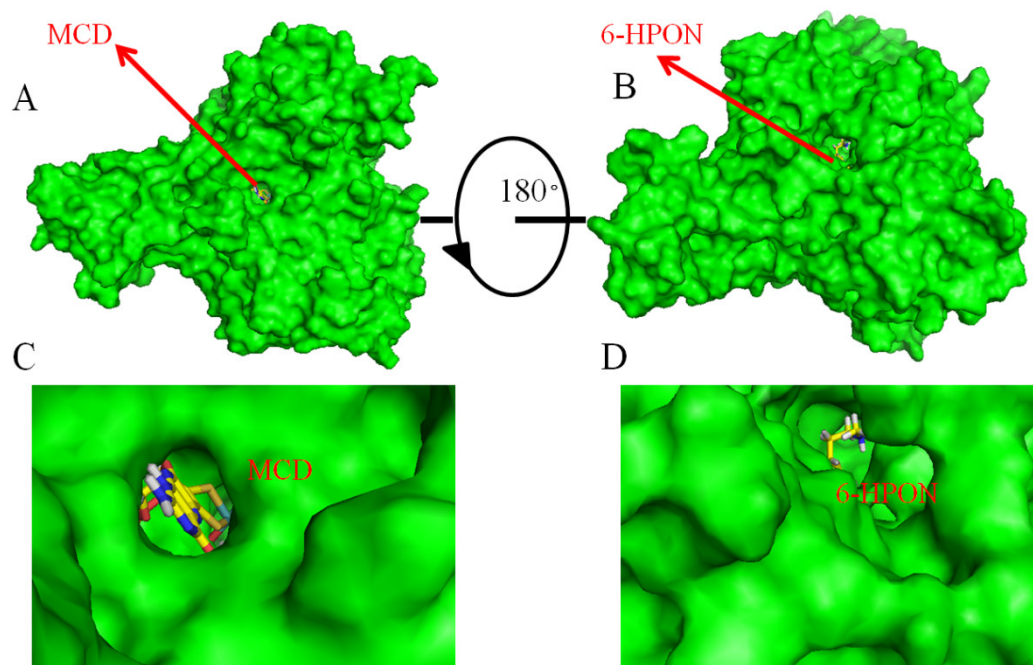

Supplementary Figure 5. KdhL is colored in green and shown as surface representation A and B. Both cofactor MCD and substrate 6-HPON are shown as sticks sitting in the channel, and the MCD can be seen at one end of the channel port (A and C). After turning vertically for 180°, 6-HPON can be seen at the other end of the channel port (B and D). C is a local magnification of A, and D is a local magnification of B.

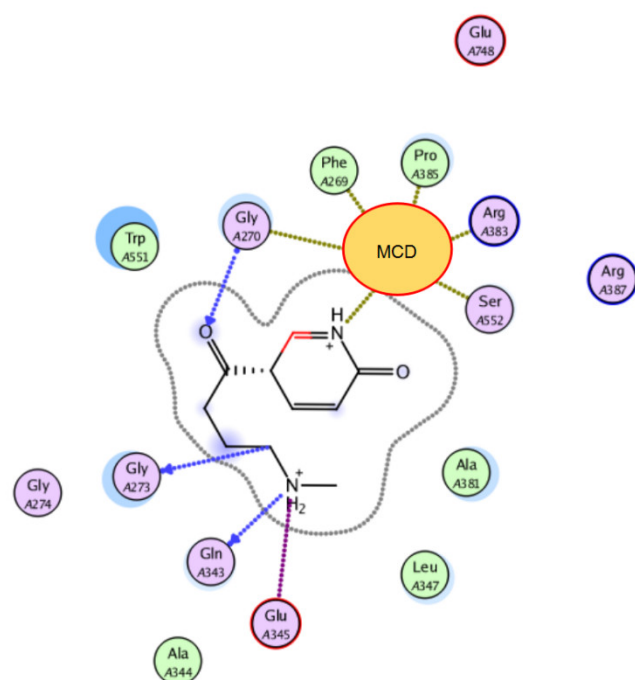

Supplementary Figure 6. Putative the amino acids that interact with MCD and 6-HPON.

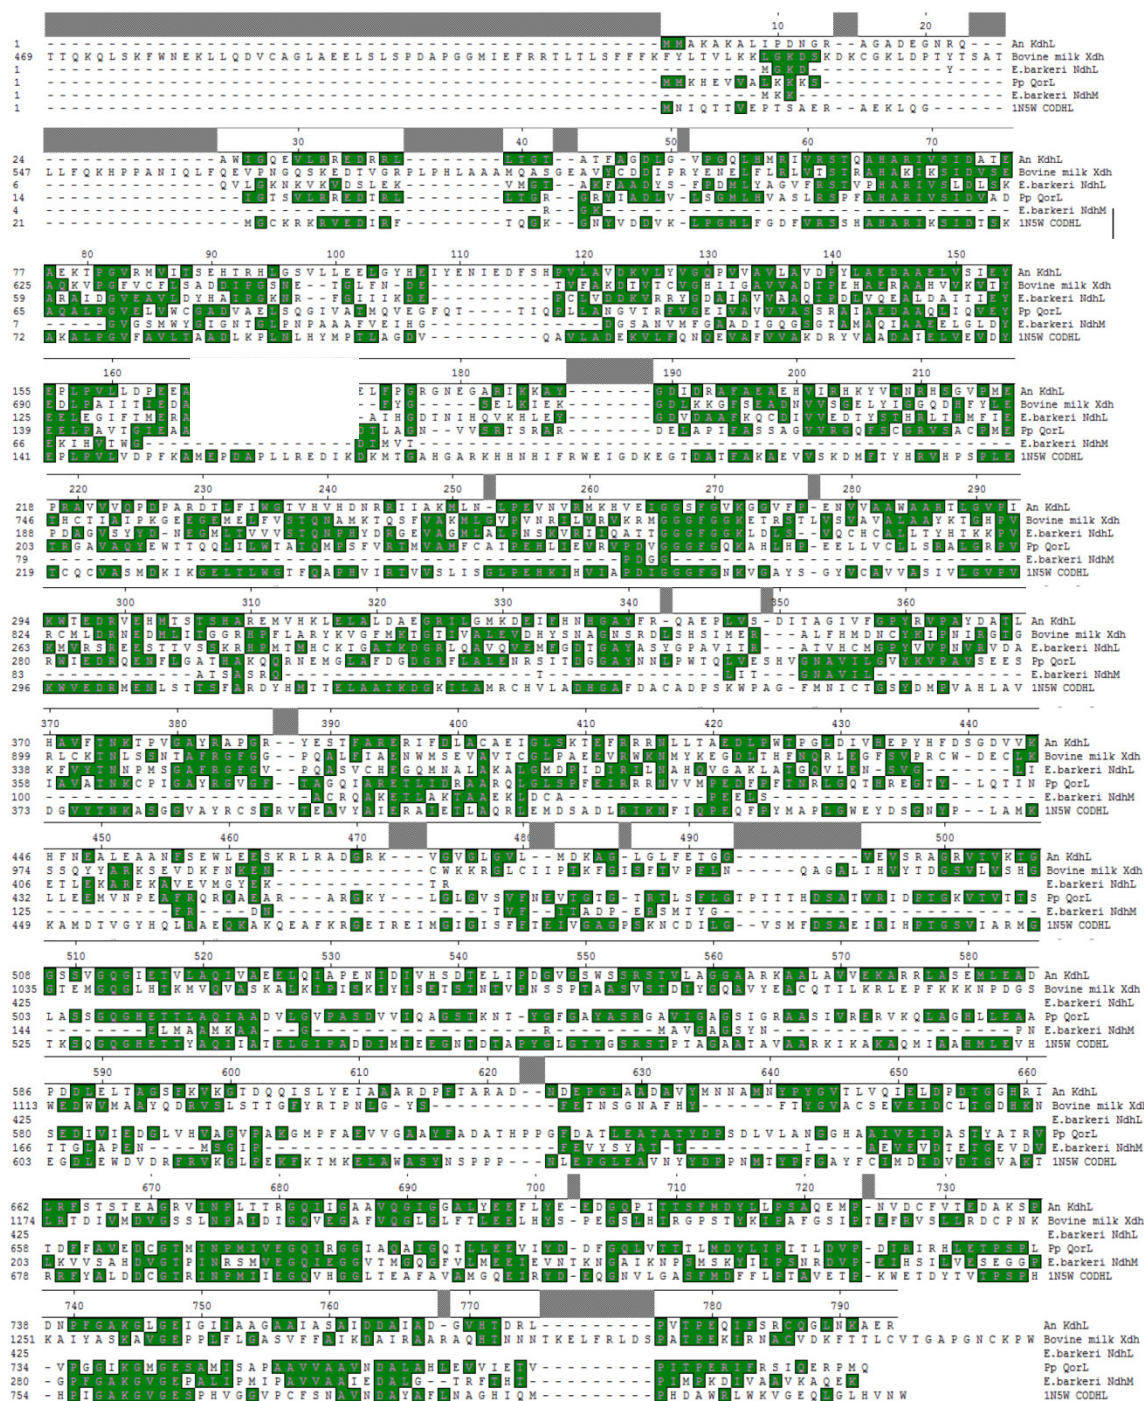

Supplementary Figure 7. Sequence alignment result of different molybdenum hydroxylases. Abbreviations: An KdhL, *Arthrobacter nicotinovorans* KdhL subunit; Xdh: bovine milk Xdh; Pp QorL, *Pseudomonas putida* 86 quinoline 2-oxidoreductase

L subunit; Eb NdhL, *Eubacterium barkeri* NdhL subunit; CODH-L, *Oligotropha carboxidovorans* carbon monoxide dehydrogenase L subunit; Eb NdhM, *Eubacterium barkeri* NdhM subunit.

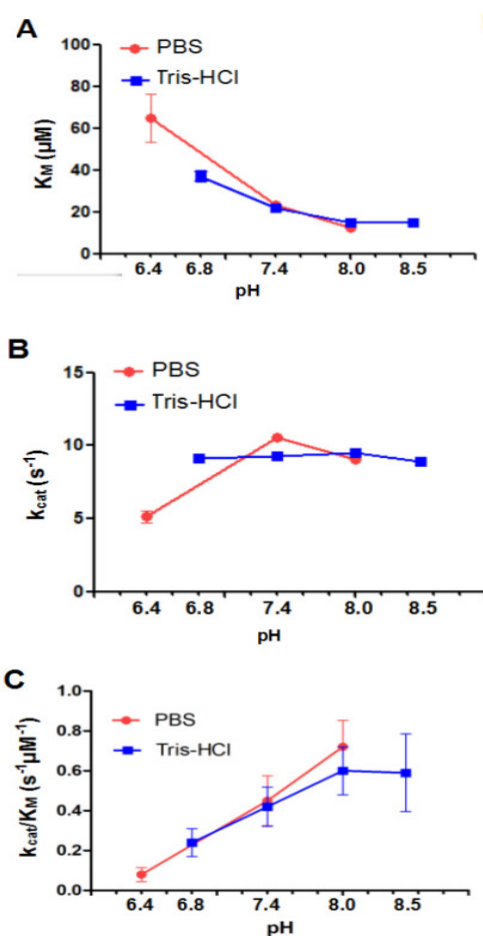

Supplementary Figure 8. The  $K_M$ ,  $k_{cat}$  and  $k_{cat}/K_M$  of Kdh in PBS/Tris-HCl buffer of different pH. (A) When the pH of PBS increased from 6.4 to 7.4, the enzyme  $K_M$  value increased (red line), when pH 8.0, the  $k_{cat}$  decreased. When the pH of Tris-HCl increased from 6.8 to 8.0, the enzyme  $k_{cat}$  value increased (B) When the pH of PBS increased from 6.4 to 7.4, the enzyme  $k_{cat}$  value increased (red line), when pH 8.0, the  $k_{cat}$  decreased. When the pH of Tris-HCl increased from 6.8 to 8.0, the enzyme  $k_{cat}$  value increased, however, when Tris-HCl pH 8.5, the  $k_{cat}$  decreased a little (blue line). (C) When the pH of PBS increased from 6.4 to 8.0, the enzyme  $k_{cat}/K_M$  value increased (red line). When the pH of Tris-HCl increased from 6.8 to 8.0, the enzyme

$k_{\text{cat}}/K_{\text{M}}$  value increased, however, when Tris-HCl pH 8.5, the  $k_{\text{cat}}/K_{\text{M}}$  decreased a little(blue line).

# Supplementary Table 1

Strains, plasmids, and primers used in this study

| Strain, plasmid       | Description or primer sequence                                            |
|-----------------------|---------------------------------------------------------------------------|
| or primer             |                                                                           |
| <b>Strain</b>         |                                                                           |
| <i>Arthrobacter</i>   | The gram-positive soil bacterium                                          |
| <i>nicotinovorans</i> |                                                                           |
| <b>Plasmids</b>       |                                                                           |
| pART2                 | Kan <sup>r</sup> , expression vector in pAO1                              |
| pART2- <i>KdhLMS</i>  | Kan <sup>r</sup> , pART2 containing <i>KdhLMS</i>                         |
| <b>Primers</b>        |                                                                           |
| KdhL <i>Bam</i> HI-F  | AAAGGAGTTGGAAAT <u>GGATCC</u> ATGCATCATCACCATC<br>ACCATATGATGGCAAAGGCTAAA |
| KdhL <i>Sal</i> I-R   | ACTTGTCCTTGTC AAGAC <u>GTCGACTT</u> ACCGTTCTGCTT<br>TGTT                  |
| KdhMS <i>Sal</i> I-F  | ACGCG <u>TGACGTCT</u> TGACAAGGACAAG                                       |
| KdhMS <i>Xba</i> I-R  | CTAGT <u>CTAGAGTC</u> GTTGTGATCTCTCTGCAA                                  |
| pART2- <i>KdhLMS</i>  | GGCGGCAGT <u>GCGGGGGT</u> GAAGGGCGGAGTCTTCCCA                             |
| -F269A-F              | GAA                                                                       |
| pART2- <i>KdhLMS</i>  | CTTCACCCCC <u>GCACTG</u> CCGCCGATCTCTACGTGTTTCA                           |
| -F269A-R              | T                                                                         |
| pART2- <i>KdhLMS</i>  | AGGCAGGCG <u>GCGCCGCT</u> AGTCAGCGACATTACTGCCG                            |

---

|                      |                                                  |
|----------------------|--------------------------------------------------|
| -E345A-F             | GC                                               |
| pART2- <i>KdhLMS</i> | GACTAGCGG <u>CGCC</u> GCCTGCCTGAAATAGGCACCATGG   |
| -E345A-R             | TT                                               |
| pART2- <i>KdhLMS</i> | GGAGCTTAC <u>CGCG</u> GCCTGGACGCTACGAGTCCACTT    |
| -R383A-F             | TC                                               |
| pART2- <i>KdhLMS</i> | TCCAGGCGC <u>CGCG</u> TAAGCTCCGACAGGTGTTTTGTTG   |
| -R383A-R             | GT                                               |
| pART2- <i>KdhLMS</i> | GTGGGTTC <u>CGCG</u> TCCAGCCGTTCAACTGTTCTTGCTGG  |
| -W551A-F             | AG                                               |
| pART2- <i>KdhLMS</i> | ACGGCTGGAC <u>CGCG</u> GGAACCCACACCGTCCGGAATAAGC |
| -W551A-R             | TC                                               |
| pART2- <i>KdhLMS</i> | GGCCTTGGG <u>CGCG</u> ATTGGCATCATTGCGGCCGGCGCGG  |
| -E748A-F             | CA                                               |
| pART2- <i>KdhLMS</i> | GATGCCAAT <u>CGCCCC</u> AAGGCCCTTGGCGCCAAAGGGG   |
| -E748A-R             | TT                                               |

---
